# Supplementary material for: Lats1 and Lats2 are required for the maintenance of multipotency in the Müllerian duct mesenchyme
Source: Oxford University Press journal article supplement (doi:10.1242/dev.180430), 2019-01-01
Supplement: dev180430supp.pdf [file dev180430supp.pdf]

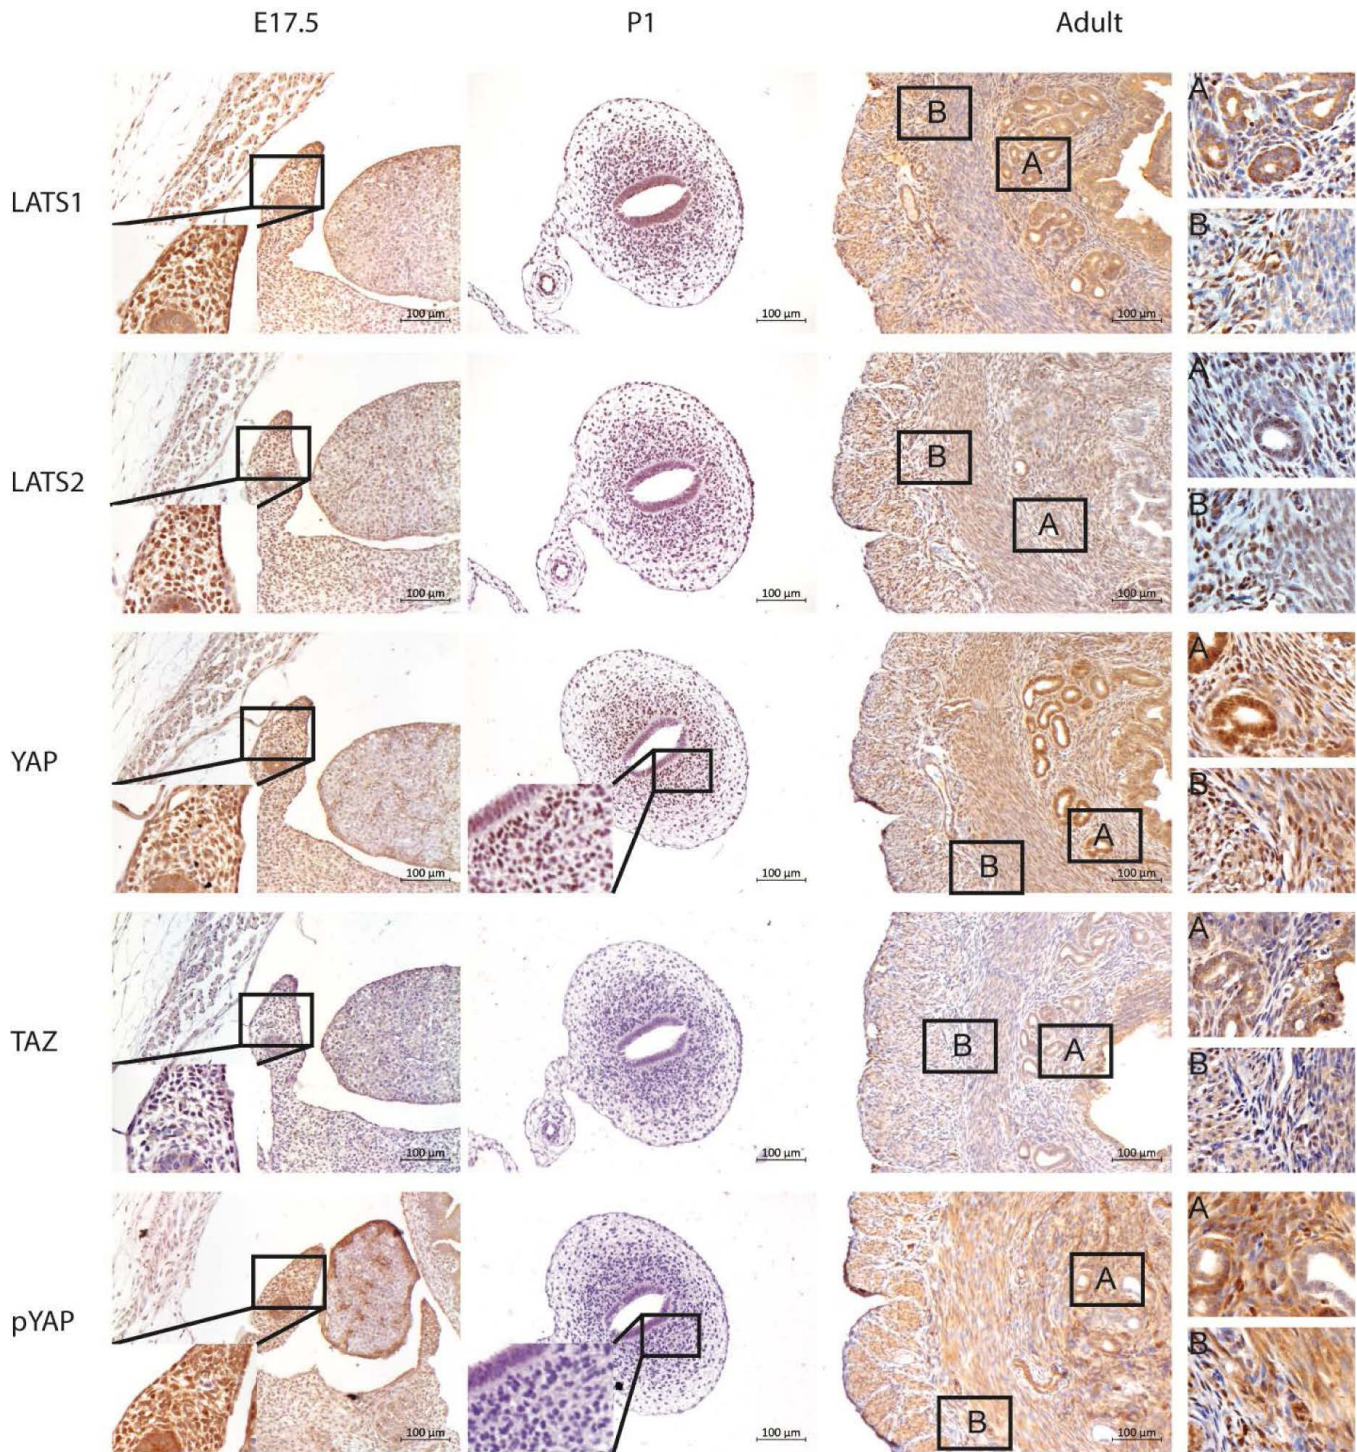

**Fig. S1. Immunohistochemical analyses of Hippo core component (LATS1, LATS2, YAP, TAZ, phosphoYAP) expression during female reproductive tract development.**

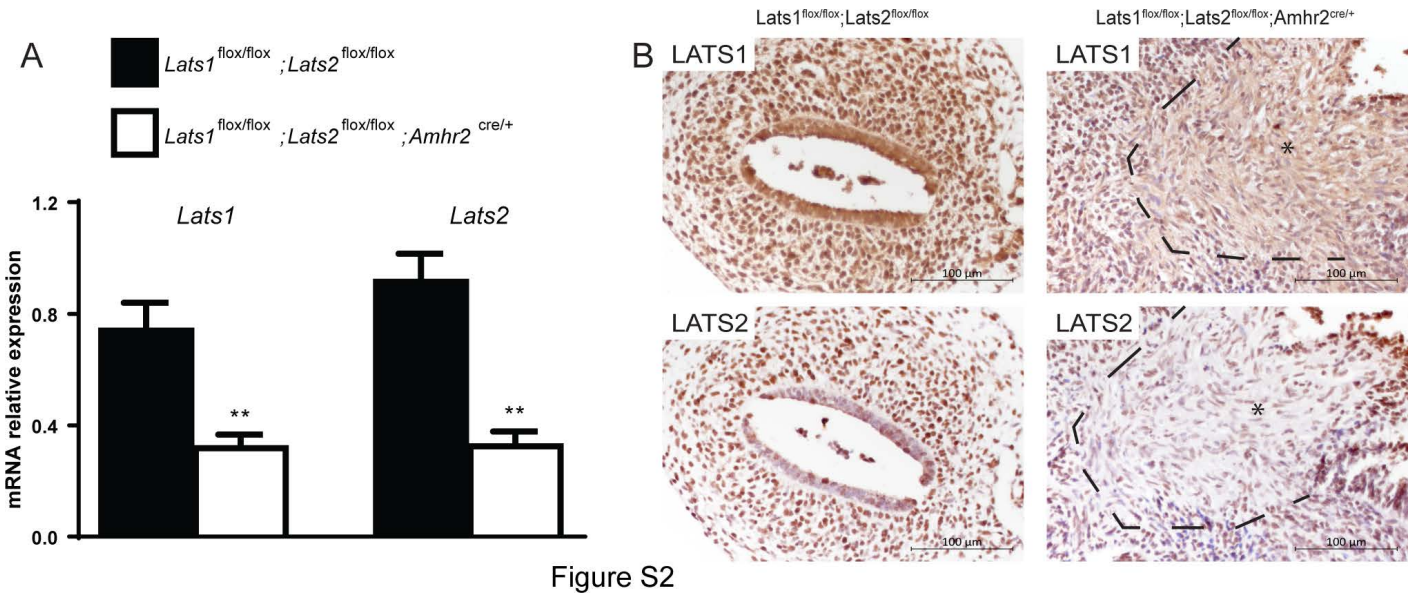

**Fig. S2. Evaluation of knockout efficiency in the female *Lats1*<sup>flox/flox</sup>; *Lats2*<sup>flox/flox</sup>; *Amhr2*<sup>cre/+</sup> reproductive tract.** (A). RT-qPCR analysis of *Lats1* and *Lats2* mRNA levels in Müllerian ducts from E17.5 mutant mice of the indicated genotypes. Data are presented as means (columns)  $\pm$  s.e.m (error bars). Columns labeled with asterisks are statistically significantly different from controls (\*\*= $P < 0.01$ ,  $n = 4$ , Student's t-test). (B). Immunohistochemistry analysis of LATS1 and LATS2 expression in uteri from P1 mice of the indicated genotypes. The ectopic myofibroblast cell population is delineated with a black dashed line. Apparent residual LATS1 and LATS2 staining in the myofibroblast population in the Müllerian ducts of *Lats1*<sup>flox/flox</sup>; *Lats2*<sup>flox/flox</sup>; *Amhr2*<sup>cre/+</sup> mice represents background signal.



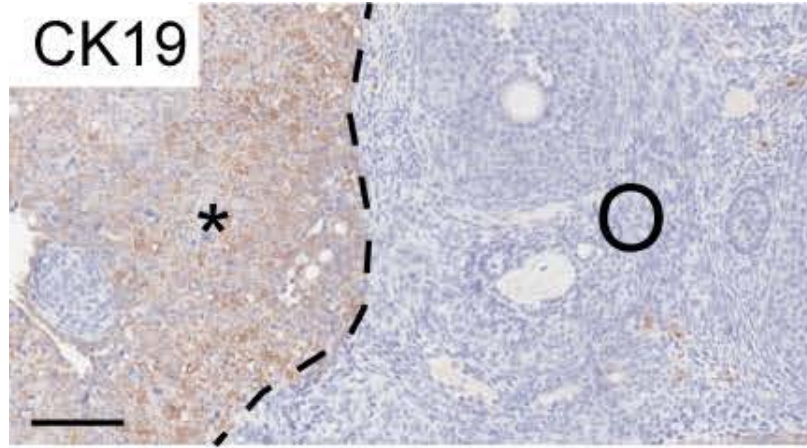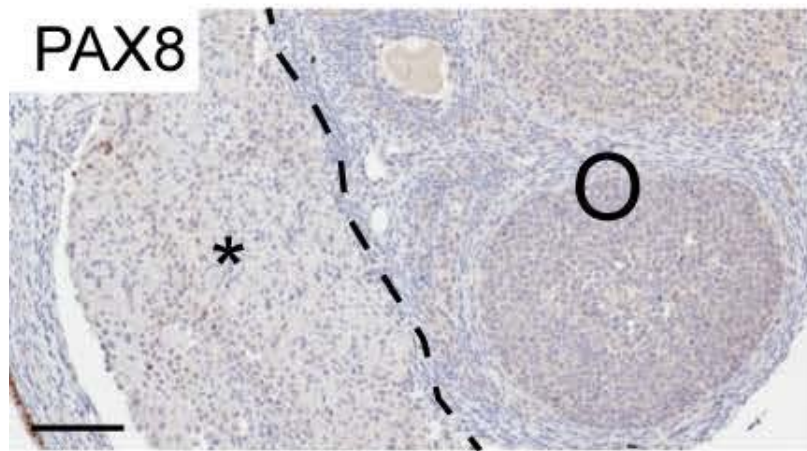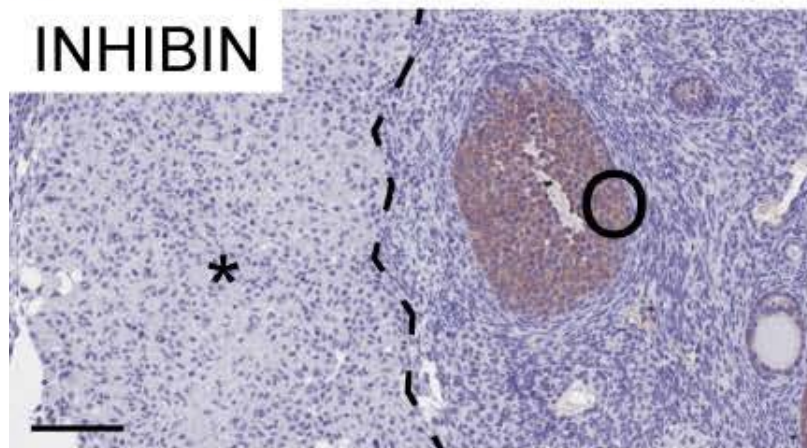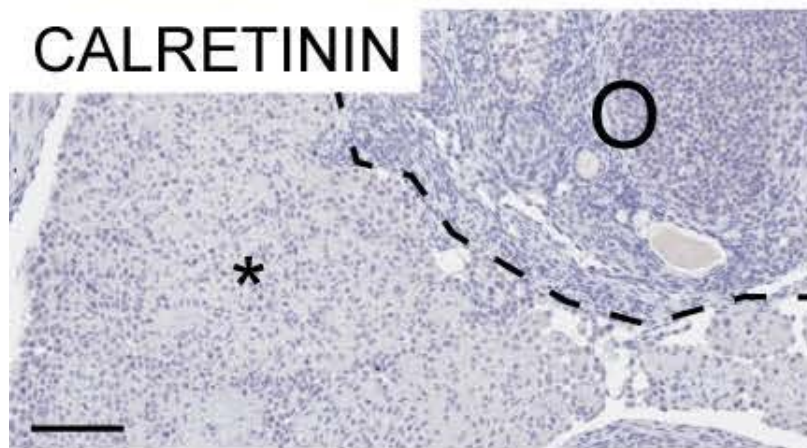



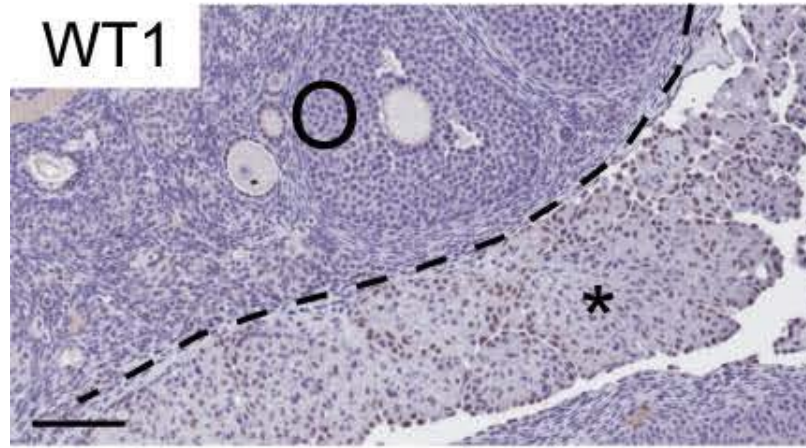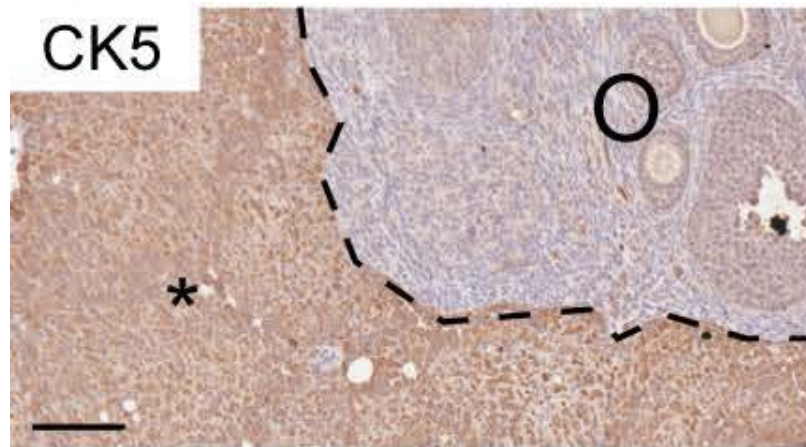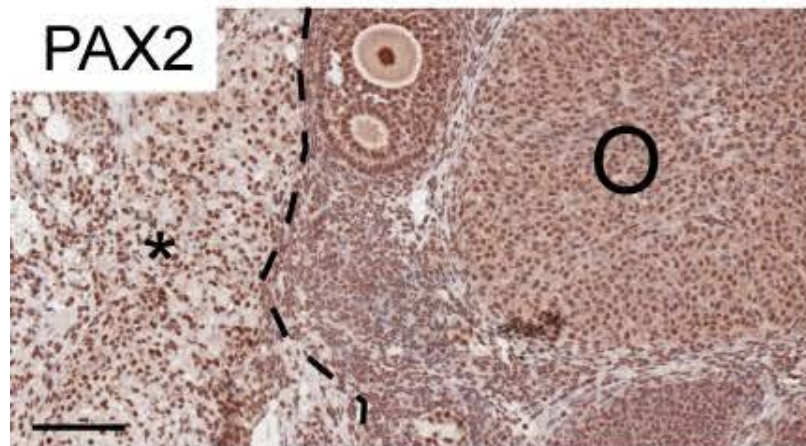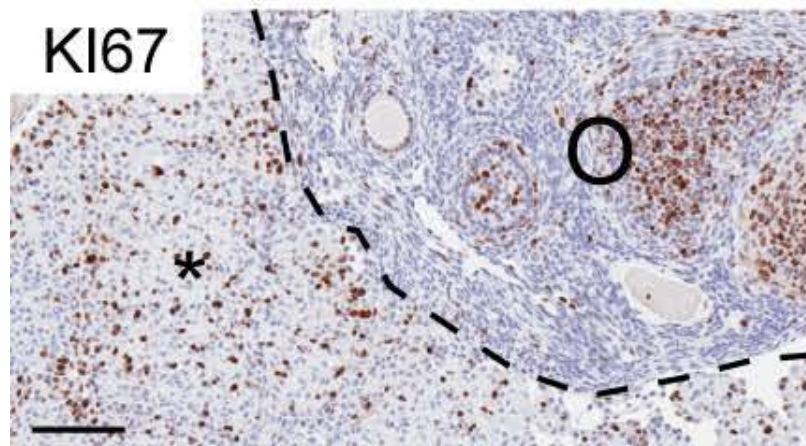

**Fig. S3. Representative tumor marker immunohistochemistry photomicrographs.** ○ = ovary, \* = neoplastic tissue. Bars = 100μM.

**A** Biological processes associated with upregulated genes in müllerian ducts of *Lats1<sup>flox/flox</sup>; Lats2<sup>flox/flox</sup>; Amhr2<sup>cre/+</sup>* mice

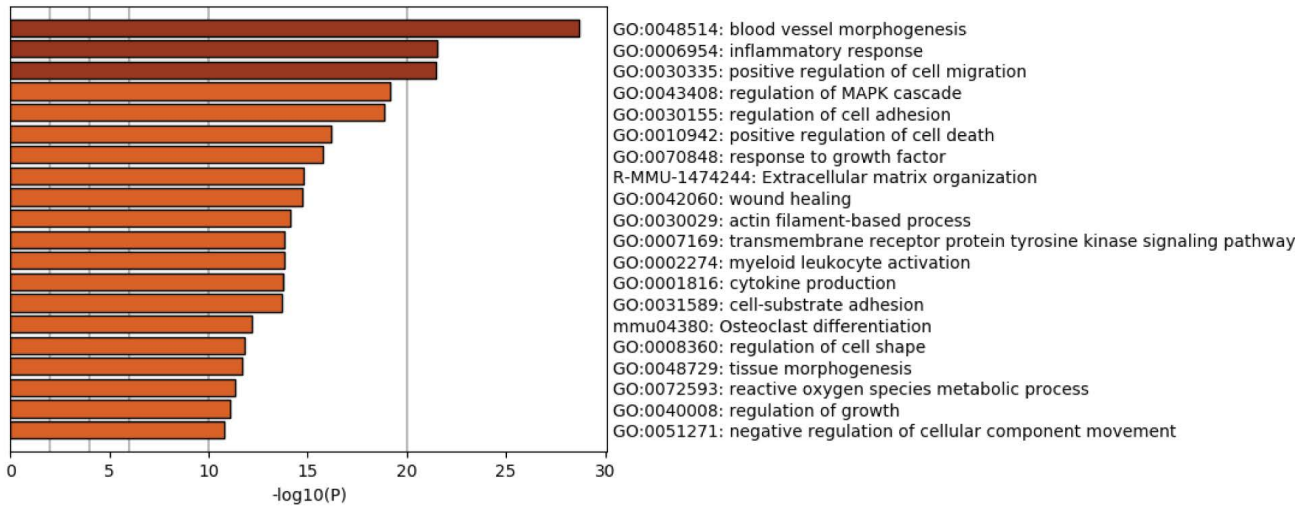

**B** Biological processes associated with downregulated genes in müllerian ducts of *Lats1<sup>flox/flox</sup>; Lats2<sup>flox/flox</sup>; Amhr2<sup>cre/+</sup>* mice

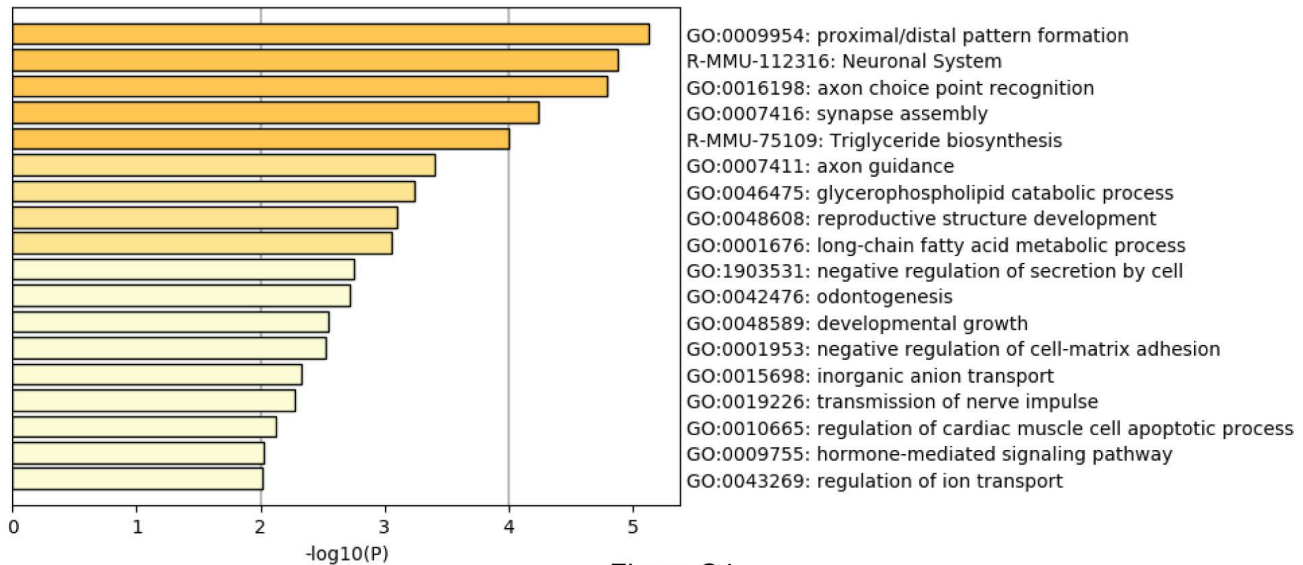

**Fig. S4. Microarray gene ontology analysis (A).** Biological processes associated with genes upregulated in the uteri of *Lats1<sup>flox/flox</sup>; Lats2<sup>flox/flox</sup>; Amhr2<sup>cre/+</sup>* mice relative to controls. (B). Biological processes associated with genes downregulated in the uteri of *Lats1<sup>flox/flox</sup>; Lats2<sup>flox/flox</sup>; Amhr2<sup>cre/+</sup>* mice relative to controls. All results were obtained using Metascape (<http://metascape.org>) (Zhou et al., 2019).

Table S1. Fertility trial.

| Genotype                                                                                              | n | Total litters | Total pups  | Litter size |
|-------------------------------------------------------------------------------------------------------|---|---------------|-------------|-------------|
| <i>Lats1</i> <sup>flox/flox</sup> ; <i>Lats2</i> <sup>flox/flox</sup>                                 | 7 | 7.57±0.30     | 67.29±5.06  | 8.88±0.37   |
| <i>Lats1</i> <sup>flox/flox</sup> ; <i>Amhr2</i> <sup>cre/+</sup>                                     | 6 | 7.86±0.14     | 60.86±4.90  | 7.75±0.46   |
| <i>Lats2</i> <sup>flox/flox</sup> ; <i>Amhr2</i> <sup>cre/+</sup>                                     | 6 | 7.83±0.17     | 55.33±4.36  | 7.06±0.34   |
| <i>Lats1</i> <sup>flox/flox</sup> ; <i>Lats2</i> <sup>flox/flox</sup> ; <i>Amhr2</i> <sup>cre/+</sup> | 6 | 0.0±0.0****   | 0.0±0.0**** | 0.0±0.0**** |

Values are expressed as means ± SEM

\*\*\*\* Means are significantly different (P<0.0001)

Table S2. Tumor marker immunohistochemistry analyses.

| Marker     | Signal strength |
|------------|-----------------|
| CK19       | ++              |
| PAX8       | +               |
| INHIBIN    | -               |
| CALRETININ | -               |
| WT1        | +/-             |
| CK5        | +++             |
| PAX2       | ++              |
| KI67       | +               |

Table S3. qPCR primers

| Gene          | Forward                   | Reverse                  |
|---------------|---------------------------|--------------------------|
| <i>Acta2</i>  | AGCCATCTTTCATTGGGATGG     | CCCCTGACAGGACCTTGTTA     |
| <i>Cald1</i>  | GTTGCTGCCCTAGAGATAGTCA    | AACCTTTGACTGTCCACCCC     |
| <i>Cnn1</i>   | TGCGCTTGTCTGTGTCATCT      | TCTGGGCCAGCTTGTTCCTT     |
| <i>Ctgf</i>   | GAGGAAAACATTAAGAAGGGCAAAA | CCGCAGAACTTAGCCCTGTA     |
| <i>Cyr61</i>  | TTGACCAGACTGGCGCTCT       | AGTTTTGCTGCAGTCCTCGT     |
| <i>Lats1</i>  | AGCAGCACGTAGAGAACGTC      | TTCATTTGATCCTGGGCATCT    |
| <i>Lats2</i>  | TGCACTGGATTCAGGTGGACTCA   | GAGAATGTGCCAGGCACCTCT    |
| <i>Nanog</i>  | ACCTGAGCTATAAGCAGGTTAAGA  | TGAATCAGACCATTGCTAGTCTTC |
| <i>Oct4</i>   | CCATGTTTCTGAAGTGCCCG      | ACCATACTCGAACCACATCCTTC  |
| <i>Prl8a2</i> | CTCACTTCTCAGGGGCACT       | AGCCATTCTCTCCTGTTTGACA   |
| <i>Ptgs2</i>  | CCTGAAGCCGTACACATCATTGA   | AGGCACTTGCATTGATGGTGGCT  |
| <i>Rpl19</i>  | CTGAAGGTCAAAGGGAATGTG     | GGACAGAGTCTTGATGATCTC    |
| <i>Sox2</i>   | GCGGAGTGGAACTTTTGTC       | CGGGAAGCGTGTACTTATCCTT   |
| <i>Spp1</i>   | CCTTGCTTGGGTTTGCAGTC      | TGGTCGTAGTTAGTCCCTCAGA   |

Table S4. ChIP primers

| Position     | Forward                   | Reverse                  |
|--------------|---------------------------|--------------------------|
| <b>-3739</b> | CAAACATCCATGCTTCCTTCCAA   | TTAAGGAGTGTGCCCTCTCACA   |
| <b>-3639</b> | TCTGGCATAACGCCCCCTG       | TGTGTCCTAGGTTTCAAGTCATGT |
| <b>-3539</b> | TGCTGACAGCCCAGTGTATG      | GTGGAACGTGACTCAAAGCC     |
| <b>-2292</b> | CACAACGCATCTGTTTCCTG      | CTCGATTTTCGTTGCTCTCAGTG  |
| <b>-1792</b> | GCCTCTTCTCTTTGAGGAATGCT   | GTGTGAGTGGCTTGAAGTGTG    |
| <b>-1242</b> | ACAACACAGGTCCTAAATGAATG   | GAAGTGTACTTAGTTTCTGTAAGG |
| <b>-208</b>  | CAGAACTGGCAAAGAGATTTTAAAG | TCCATATCATCTTCTCACCCCTC  |
| <b>-108</b>  | GCGAGCTAAAGTGTGCCAG       | TTGACACTCCACATTCCTCCG    |
| <b>-58</b>   | GTGTCAAGGGGTCAGGATCAA     | CCACCTTCTGCCTCATCAAC     |
| <b>-43</b>   | TGAGTTGATGAGGCAGGAAGG     | CGCAAAGAAGTGAATGGAGTC    |
| <b>462</b>   | GAAGTGTGTACGGAGCGTGAC     | CAGAAGAGGCCCTTGTGTGGG    |
